# Supplementary material for: A Day-to-Day Dynamical Approach to the Most Likely User Equilibrium Problem
Source: Atypon-hosted journal article supplement (doi:10.1287/trsc.2024.0525), 2024-07-08
Supplement: trsc.2024.0525.sm1.pdf [file trsc.2024.0525.sm1.pdf]

# E-companion to the paper titled “A Day-to-Day Dynamical Approach to the Most Likely User Equilibrium Problem”

## Appendix A Explanation of the Entropy Function

In Section 2.1, we have defined the negative entropy of a route choice strategy  $\mathbf{p} \in \mathcal{P}$  as

$$\phi(\mathbf{p}) = \langle \text{diag}(\mathbf{q})\mathbf{p}, \log(\mathbf{p}) \rangle.$$

To explain how this measures “the number of states” (i.e., the different ways travelers can be arranged to produce the route flow corresponding to  $\mathbf{p}$ ), suppose that the flow carried by a single traveler is  $\tau > 0$  ( $\tau$  is a small constant). Hence, the number of travelers traveling between each OD pair  $w \in \mathcal{W}$  and selecting each route  $k \in \mathcal{K}_w$  would be  $n_w = q_w/\tau$  and  $m_k = f_k/\tau$ , respectively. Applying the basic counting principle, the total number of states, after taking the logarithm, reads

$$\begin{aligned} \log\left(\prod_{w \in \mathcal{W}} \frac{n_w!}{\prod_{k \in \mathcal{K}_w} m_k!}\right) &= \sum_{w \in \mathcal{W}} (\log(n_w!) - \sum_{k \in \mathcal{K}_w} \log(m_k!)) \\ &= \sum_{w \in \mathcal{W}} (n_w \log(n_w) - n_w + \mathcal{O}(\log(n_w)) - \sum_{k \in \mathcal{K}_w} m_k \log(m_k) - m_k + \mathcal{O}(\log(m_k))), \\ &= \sum_{w \in \mathcal{W}} (n_w \log(n_w) + \mathcal{O}(\log(n_w)) - \sum_{k \in \mathcal{K}_w} m_k \log(m_k) + \mathcal{O}(\log(m_k))), \end{aligned}$$

where Stirling’s formula gives the second equality, while the relation  $n_w = \sum_{k \in \mathcal{K}_w} m_k$  gives the third one. When  $\tau$  is sufficiently small (as close to the nonatomic setting), we would have  $n_w \rightarrow \infty$  and  $m_k \rightarrow \infty$ . Hence, the term  $\mathcal{O}(\log(n_w))$  and  $\mathcal{O}(\log(m_k))$  would become eligible relative to  $n_w \log(n_w)$  and  $m_k \log(m_k)$ . Further noting that

$$\sum_{w \in \mathcal{W}} (n_w \log(n_w) - \sum_{k \in \mathcal{K}_w} m_k \log(m_k)) = \sum_{w \in \mathcal{W}} \sum_{k \in \mathcal{K}_w} m_k (\log(n_w) - \log(m_k)) = -\frac{1}{\tau} \cdot \sum_{w \in \mathcal{W}} q_w \sum_{k \in \mathcal{K}_w} p_k \log(p_k),$$

we have

$$\log\left(\prod_{w \in \mathcal{W}} \frac{n_w!}{\prod_{k \in \mathcal{K}_w} m_k!}\right) \approx -\frac{1}{\tau} \cdot \sum_{w \in \mathcal{W}} q_w \sum_{k \in \mathcal{K}_w} p_k \log(p_k) = -\frac{1}{\tau} \cdot \langle \text{diag}(\mathbf{q})\mathbf{p}, \log(\mathbf{p}) \rangle,$$

when  $\tau$  is sufficiently small. Dropping  $\tau$  (which is a constant) then gives rise to the entropy function for evaluating the likelihood of  $\mathbf{p}$  in our setting.

## Appendix B Proofs in Section 3

### B.1 Proof of Lemma 1

*Proof.* We first note that for all  $\mathbf{s}^t \in \mathbb{R}^{|\mathcal{K}|}$ , the corresponding logit choice can be written in the vector form as  $q_r(\mathbf{s}^t) = \mathbf{y}^t / \mathbf{\Sigma}^T \mathbf{\Sigma} \mathbf{y}^t$ , where  $\mathbf{y}^t = \exp(-r \cdot \mathbf{s}^t)$ . As each column of  $\mathbf{\Sigma}$  is a standard unit vector, we have  $\log(\mathbf{\Sigma}^T \mathbf{\Sigma} \mathbf{y}^t) = \mathbf{\Sigma}^T \log(\mathbf{\Sigma} \mathbf{y}^t)$ . Denoting  $\mathbf{x}^t = \bar{\mathbf{\Lambda}} \mathbf{p}^t$  for all  $t \geq 0$ , we can show

$$\begin{aligned} \langle \mathbf{e}, \log(\mathbf{p}^t) \rangle &= \langle \mathbf{e}, \log(\mathbf{y}^t) - \log(\mathbf{\Sigma}^T \mathbf{\Sigma} \mathbf{y}^t) \rangle = \langle \mathbf{e}, -r \cdot \mathbf{s}^t - \mathbf{\Sigma}^T \log(\mathbf{\Sigma} \mathbf{y}^t) \rangle \\ &= \langle \mathbf{e}, -r \cdot \mathbf{s}^t \rangle = -r \cdot \sum_{i=0}^{t-1} \eta^i \cdot \langle \mathbf{e}, \mathbf{\Lambda}^T \mathbf{x}^i \rangle + \langle \mathbf{e}, -r \cdot \mathbf{s}^0 \rangle = -r \cdot \langle \mathbf{e}, \mathbf{s}^0 \rangle. \end{aligned} \tag{31}$$

The first and the second equalities hold due to the earlier discussions, the third and fifth equalities hold because  $\mathbf{e} \in \ker(\mathbf{\Sigma})$  and  $\mathbf{e} \in \ker(\mathbf{\Lambda})$ , respectively, and the fourth equality is obtained by applying Equation (7).  $\square$

## B.2 Proof of Lemma 2

*Proof.* Per Proposition 2, the KL projection problem (10) can be written as

$$\begin{aligned} \min_{\mathbf{p}^* \geq 0} \quad & \langle \text{diag}(\mathbf{q})\mathbf{p}^*, \log(\mathbf{p}^*) - \log(\mathbf{p}^0) \rangle. \\ \text{s.t.} \quad & \mathbf{\Sigma} \text{diag}(\mathbf{q})\mathbf{p}^* = \mathbf{d}, \quad \mathbf{\Lambda} \text{diag}(\mathbf{q})\mathbf{p}^* = \mathbf{x}^*, \end{aligned} \quad (32)$$

which is evidently a convex program. Hence, any  $\bar{\mathbf{p}}^* \in \mathcal{P}^*$  solves (32) if and only if there exist  $\boldsymbol{\alpha} \in \mathbb{R}^{|\mathcal{K}|}$  and  $\boldsymbol{\beta} \in \mathbb{R}^{|\mathcal{A}|}$  such that

$$\begin{cases} \bar{\mathbf{p}}^* \geq 0, & \log(\bar{\mathbf{p}}^*) - \log(\mathbf{p}^0) - \mathbf{\Sigma}^\top \boldsymbol{\alpha} - \mathbf{\Lambda}^\top \boldsymbol{\beta} \geq 0, \\ \langle \bar{\mathbf{p}}^*, \log(\bar{\mathbf{p}}^*) - \log(\mathbf{p}^0) - \mathbf{\Sigma}^\top \boldsymbol{\alpha} - \mathbf{\Lambda}^\top \boldsymbol{\beta} \rangle = 0. \end{cases} \quad (33)$$

If  $\langle \mathbf{e}, \log(\bar{\mathbf{p}}^*) - \log(\mathbf{p}^0) \rangle = 0$  for all  $\mathbf{e} \in \ker(\mathbf{\Sigma}) \cap \ker(\mathbf{\Lambda})$ , then  $\log(\bar{\mathbf{p}}^*) - \log(\mathbf{p}^0) \in \text{im}(\mathbf{\Sigma}^\top) \cup \text{im}(\mathbf{\Lambda}^\top)^\perp$ , which means one can always find  $\boldsymbol{\alpha} \in \mathbb{R}^{|\mathcal{K}|}$  and  $\boldsymbol{\beta} \in \mathbb{R}^{|\mathcal{A}|}$  such that

$$\log(\bar{\mathbf{p}}^*) - \log(\mathbf{p}^0) = \mathbf{\Sigma}^\top \boldsymbol{\alpha} + \mathbf{\Lambda}^\top \boldsymbol{\beta}.$$

Thus, Condition (33) must be satisfied.  $\square$

## B.3 Proof of Theorem 1

*Proof.* Per Lemma 1, for all  $\mathbf{e} \in \ker(\mathbf{\Sigma}) \cap \ker(\mathbf{\Lambda})$ , the value of  $\langle \mathbf{e}, \log(\mathbf{p}^t) \rangle$  is the same for all  $t \geq 0$  given  $\mathbf{p}^0$ . This observation leads to

$$\langle \mathbf{e}, \log(\mathbf{p}^t) - \log(\mathbf{p}^0) \rangle = 0. \quad (34)$$

Noting that the function  $\langle \mathbf{e}, \log(\mathbf{p}) - \log(\mathbf{p}^0) \rangle$  is continuous in  $\mathbf{p}$ , we obtain  $\langle \mathbf{e}, \log(\bar{\mathbf{p}}^*) - \log(\mathbf{p}^0) \rangle = 0$  by letting  $t \rightarrow \infty$  in Equation (34). This implies  $\bar{\mathbf{p}}^*$  is the KL projection of  $\mathbf{p}^0$  on  $\mathcal{P}^*$  according to Lemma 2.  $\square$

## B.4 Proof of Corollary 3

*Proof.* We first note that  $\text{supp}(\bar{\mathbf{p}}^*) \subseteq \mathcal{K}^*$  because  $\bar{\mathbf{p}}^* \in \mathcal{P}^*$ . Suppose  $\bar{\mathbf{p}}^*$  is the limiting point of the CumLog model but there exists  $k \in \mathcal{K}^*$  such that  $k \notin \text{supp}(\bar{\mathbf{p}}^*)$ , then we must have  $\bar{p}_k^* = 0$ . Construct a function  $l(\varepsilon) = D((1 - \varepsilon) \cdot \bar{\mathbf{p}}^* + \varepsilon \cdot \mathbf{p}^0, \mathbf{p}^0)$ , where  $D(\cdot, \cdot)$  is the KL divergence defined in (9). The reader can verify that the derivative of  $l(\cdot)$  at  $\varepsilon = 0$  is  $-\infty$ . This means moving from  $\bar{\mathbf{p}}^*$  toward  $\mathbf{p}^0$  can reduce the KL divergence. Hence,  $\bar{\mathbf{p}}^*$  cannot be the solution to the KL projection problem (10), or the limiting point of the CumLog model, a contradiction.  $\square$

<sup>1</sup>For any matrix  $\mathbf{A} \in \mathbb{R}^{m \times n}$ , we have  $\ker(\mathbf{A})^\perp = \text{im}(\mathbf{A}^\top)$ , i.e., the perpendicular complement of  $\ker(\mathbf{A})$  is  $\text{im}(\mathbf{A}^\top)$ .

## B.5 Proof of Proposition 7

*Proof.* If  $\mathbf{s}^0 = \mathbf{\Lambda}^\top \mathbf{v}^0$ , then for any  $\mathbf{e} \in \ker(\mathbf{\Sigma}) \cap \ker(\mathbf{\Lambda})$ , we have  $\langle \mathbf{e}, \mathbf{s}^0 \rangle = \langle \mathbf{e}, \mathbf{\Lambda}^\top \mathbf{v}^0 \rangle = \langle \mathbf{\Lambda} \mathbf{e}, \mathbf{v}^0 \rangle = 0$ . Thus, Lemma 1 guarantees  $\langle \mathbf{e}, \log(\mathbf{p}^t) \rangle = -r \cdot \langle \mathbf{e}, \mathbf{s}^0 \rangle = 0$  for any  $\mathbf{e}$  and  $t \geq 0$ . As the function  $\langle \mathbf{e}, \log(\mathbf{p}) \rangle$  is continuous in  $\mathbf{p}$ , letting  $t \rightarrow \infty$  leads to  $\langle \mathbf{e}, \log(\bar{\mathbf{p}}^*) \rangle = 0$  for any  $\mathbf{e}$ , which implies  $\bar{\mathbf{p}}^*$  is the MEUE strategy according to Proposition 4.  $\square$

## Appendix C Proofs in Section 4

### C.1 Proof of Proposition 8

*Proof.* First, as there are a finite number of acyclic paths in a network, the discovery process must stop adding new routes after finite days (note that cyclic paths can never be a shortest route as long as the link cost is strictly positive). That is, there must exist  $T_1 < \infty$  and  $\bar{\mathcal{K}}_+ \subseteq \mathcal{K}$  such that  $\mathcal{K}_+^t = \bar{\mathcal{K}}_+$  for all  $t \geq T_1$ . Starting from  $t = T_1$ , Algorithm 1 reduces to the original CumLog model without route exploration, applied to solving a ‘‘reduced’’ routing game in which only routes in  $\bar{\mathcal{K}}_+$  are available. Denote the route-link incidence matrix corresponding to  $\bar{\mathcal{K}}_+$  as  $\bar{\mathbf{\Lambda}}_+$  and define  $c_+ : \bar{\mathcal{P}}_+ \rightarrow \mathbb{R}^{|\bar{\mathcal{K}}_+|}$  as a map that satisfies

$$c_+(\mathbf{p}_+) = \bar{\mathbf{\Lambda}}_+^\top u(\mathbf{x}), \quad \text{where } \mathbf{x} = \bar{\mathbf{\Lambda}}_+ \text{diag}(\bar{\mathbf{\Sigma}}_+^\top \mathbf{d}) \mathbf{p}_+. \quad (35)$$

By Proposition 5, as long as  $r < 1/2\bar{L}$  for some  $L \geq \max_{\mathbf{p}_+ \in \bar{\mathcal{P}}_+} \|\nabla c_+(\mathbf{p}_+)\|_2$ , the route choice strategy  $\mathbf{p}'_+$  must converge to a fixed point  $\bar{\mathbf{p}}_+ \in \bar{\mathcal{P}}_+$ , which is a UE of the reduced routing game.

We then claim  $\bar{\mathbf{p}} = [\bar{\mathbf{p}}_+; \mathbf{0}] \in \mathcal{P}^*$ . To simplify the proof, let us assume  $|\mathcal{W}| = 1$  without loss of generality; otherwise, we can simply pick one  $w \in \mathcal{W}$  to raise the following conflict. Suppose that  $\bar{\mathbf{p}} \notin \mathcal{P}^*$ , then given any  $k_0 \in \arg \min_{k \in \mathcal{K}} c_k(\bar{\mathbf{p}})$ , we must have  $c_0 := c_{k_0}(\bar{\mathbf{p}}) < c_{\min} := \min_{k \in \bar{\mathcal{K}}_+} c_k(\bar{\mathbf{p}})$ . Hence,  $k_0 \in \mathcal{K} \setminus \bar{\mathcal{K}}_+$ , i.e., there exist some  $k_0 \in \mathcal{K} \setminus \bar{\mathcal{K}}_+$  strictly better than any routes in  $\bar{\mathcal{K}}_+$ . For notational simplicity, let us define  $\mathbf{p}^t = [\mathbf{p}'_+; \mathbf{0}]$  for all  $t \geq T_1$ . Since  $\mathbf{p}'_+ \rightarrow \bar{\mathbf{p}}_+ \Rightarrow \mathbf{p}^t \rightarrow \bar{\mathbf{p}} \Rightarrow c(\mathbf{p}^t) \rightarrow c(\bar{\mathbf{p}})$  and  $\min_{k \in \bar{\mathcal{K}}_+} c_k(\mathbf{p}^t) \rightarrow c_{\min}$ , there must exist  $T_2 > T_1$  such that whenever  $t \geq T_2$ , we have

$$c_{k_0}(\mathbf{p}^t) < c_0 + \delta/3 \quad \text{and} \quad \min_{k \in \bar{\mathcal{K}}_+} c_k(\mathbf{p}^t) > c_{\min} - \delta/3, \quad (36)$$

where  $\delta = c_{\min} - c_0$ . This means on day  $T_2$ , route  $k_0$  is strictly better than all routes in  $\bar{\mathcal{K}}_+$ . Hence, the route discovery process has not stabilized at  $T_2$ , which contradicts with the assumption that  $\mathcal{K}_+^t$  remains unchanged after  $t \geq T_1$ .  $\square$

### C.2 Proof of Proposition 9

*Proof.* Let  $\mathcal{K}_+^t = \bar{\mathcal{K}}_+$  for all  $t \geq T_1$  for some  $T_1 > 0$ . Starting from  $T_1$ , Algorithm 2 is reduced to the original CumLog model applied to solving a routing game defined on  $\bar{\mathcal{K}}_+$ . By viewing  $t = T_1$  as an initial point of Algorithm 2, Condition (B) given in Proposition 7 is satisfied. Hence,  $\bar{\mathbf{p}}_+ = \lim_{t \rightarrow \infty} \mathbf{p}'_+$  must be the MEUE strategy of the reduced problem.

We proceed to prove  $\bar{\mathbf{p}} = [\bar{\mathbf{p}}_+; \mathbf{0}]$  is the MEUE strategy of the original routing game as long as  $\bar{\mathcal{K}}_+ \supseteq \cup_{\mathbf{p}^*} \text{supp}(\mathbf{p}^*)$ . We first define  $\phi_+ : \bar{\mathcal{P}}_+ \rightarrow \mathbb{R}$  as the negative entropy function of the reduced routing game, which reads

$$\phi_+(\mathbf{p}_+) = \langle \text{diag}(\bar{\mathbf{q}}_+) \mathbf{p}_+, \log(\mathbf{p}_+) \rangle, \quad \text{where } \bar{\mathbf{q}}_+ = (\bar{\mathbf{\Sigma}}_+^\top)^\top \mathbf{d}. \quad (37)$$

Denoting  $\overline{\mathcal{P}}_+^* \subseteq \overline{\mathcal{P}}_+$  as the set of UE strategies for the reduced routing game, we claim

$$\min_{\mathbf{p}_+^* \in \overline{\mathcal{P}}_+^*} \phi_+(\mathbf{p}_+^*) \leq \min_{\mathbf{p}^* \in \mathcal{P}^*} \phi(\mathbf{p}^*). \quad (38)$$

To see this, consider a map  $h : \mathcal{P}^* \rightarrow \overline{\mathcal{P}}_+$  such that  $h(\mathbf{p}^*) = (p_k^*)_{k \in \overline{\mathcal{K}}_+}$ , i.e., it “cuts off” all elements in  $\mathcal{K} \setminus \overline{\mathcal{K}}_+$ . As  $\cup_{\mathbf{p}^*} \text{supp}(\mathbf{p}^*) \subseteq \overline{\mathcal{K}}_+$ , the elements dropped by the map  $h$  must all be zero. Hence, we conclude that for all  $\mathbf{p}^* \in \mathcal{P}^*$ , (1)  $h(\mathbf{p}^*) \in \overline{\mathcal{P}}_+^*$ ; (2)  $\phi_+(h(\mathbf{p}^*)) = \phi(\mathbf{p}^*)$ . Combining both, Equation (38) must hold. Recalling that  $\phi_+(\overline{\mathbf{p}}_+) = \min_{\mathbf{p}_+^* \in \overline{\mathcal{P}}_+^*} \phi_+(\mathbf{p}_+^*)$ , we derive  $\phi_+(\overline{\mathbf{p}}_+) \leq \min_{\mathbf{p}^* \in \mathcal{P}^*} \phi(\mathbf{p}^*)$ . Finally, as  $\overline{\mathbf{p}} = [\overline{\mathbf{p}}_+; \mathbf{0}] \in \mathcal{P}^*$  and  $\phi_+(\overline{\mathbf{p}}_+) = \phi(\overline{\mathbf{p}})$ , we have  $\phi(\overline{\mathbf{p}}) = \min_{\mathbf{p}^* \in \mathcal{P}^*} \phi(\mathbf{p}^*)$ , which means  $\overline{\mathbf{p}}$  is the MEUE of the original routing game.  $\square$
